# Supplementary material
Source: publisher figshare collection journal article supplement (https://karger.figshare.com/ndownloader/files/28515921)
Supplement: Supplementary file 1 [file 28515921]

**Supplementary Figure 1.** Geographic distribution of riluzole prescriptions per MSA from 2013-2017 for MarketScan or IDV databases. The central longitudinal and latitudinal coordinate is displayed for each MSA. Heat map values are depicted in ALS patients with riluzole prescription per 100,000 sample population from <0.12 to >10.59 for MarketScan and <0.59 to >6.13 for IDV (light orange to dark red color spectrum).

**Supplementary Figure 2.** US regional distribution of base sample population for 2017 from MarketScan (top) or IDV (bottom) compared to the US Census distribution. Data are displayed in percentage of total population in each standardize geographic region – Northeast, North Central, South, or West.
